# Supplementary material for: Integrated multi-cohort analysis of the Parkinson’s disease gut metagenome
Source: bioRxiv or medRxiv preprint supplement (doi:10.1101/2022.07.20.500694), 2022-07-20
Supplement: Supplementary file [file media-1.pdf]

| Characteristic         | N  | N = 88 <sup>1</sup>     |
|------------------------|----|-------------------------|
| disease_duration       | 40 | 7.0 (5.0, 11.0)         |
| age_of_onset           | 40 | 58 (51, 61)             |
| bristol_stool_scale    | 72 | 3.00 (2.00, 4.00)       |
| updrs_total            | 35 | 17 (11, 22)             |
| mds_updrs_3_total      | 8  | 16 (10, 22)             |
| mds_updrs_survey_total | 14 | 30 (17, 40)             |
| hy_stage               | 32 | 2.0000 (2.0000, 2.0000) |
| smell_score_upsit      | 8  | 19.0 (14.5, 23.5)       |
| olfactory_diagnosis    | 8  | 4.50 (4.00, 5.00)       |

<sup>1</sup> Median (IQR)
