# Supplementary material for: Integrated multi-cohort analysis of the Parkinson’s disease gut metagenome
Source: bioRxiv or medRxiv preprint supplement (doi:10.1101/2022.07.20.500694), 2022-07-20
Supplement: Supplementary file [file media-2.pdf]

| Characteristic       | N   | Rush-HC, N =<br>30 <sup>1</sup>           | Rush-PC, N =<br>42 <sup>1</sup>           | Rush-PD, N =<br>42 <sup>1</sup>           | TBC-HC, N =<br>26 <sup>1</sup>          | TBC-PC, N =<br>41 <sup>1</sup>           | TBC-PD, N =<br>46 <sup>1</sup>           | p-<br>value <sup>2</sup> |
|----------------------|-----|-------------------------------------------|-------------------------------------------|-------------------------------------------|-----------------------------------------|------------------------------------------|------------------------------------------|--------------------------|
| host_age             | 225 | 62 (59, 70)                               | 66 (65, 69)                               | 62 (59, 68)                               | 70 (59, 73)                             | 56 (48, 62)                              | 68 (57, 73)                              | <0.001                   |
| sex                  | 227 |                                           |                                           |                                           |                                         |                                          |                                          | 0.069                    |
| female               |     | 18 (60%)                                  | 15 (36%)                                  | 12 (29%)                                  | 14 (54%)                                | 21 (51%)                                 | 21 (46%)                                 |                          |
| male                 |     | 12 (40%)                                  | 27 (64%)                                  | 30 (71%)                                  | 12 (46%)                                | 20 (49%)                                 | 25 (54%)                                 |                          |
| host_body_mass_index | 205 | 27 (22, 32)                               | 34 (32, 40)                               | 27 (22, 29)                               | 25 (24, 28)                             | 24 (21, 25)                              | 24 (22, 26)                              | <0.001                   |
| total_reads          | 227 | 22,578,266<br>(19,139,010,<br>24,040,706) | 25,179,790<br>(21,169,508,<br>27,678,346) | 19,726,516<br>(16,047,950,<br>23,503,010) | 9,235,316<br>(8,818,786,<br>11,453,143) | 10,989,657<br>(8,714,403,<br>13,727,201) | 11,642,414<br>(9,111,935,<br>13,946,721) | <0.001                   |
| bristol_stool_scale  | 154 | 4.00 (3.00,<br>6.00)                      | NA (NA, NA)                               | 3.00 (2.00,<br>3.75)                      | 4.00 (4.00,<br>5.00)                    | 4.00 (4.00,<br>5.00)                     | 4.00 (2.25,<br>4.00)                     | 0.001                    |

<sup>1</sup> Median (IQR); n (%)

<sup>2</sup> Kruskal-Wallis rank sum test; Pearson's Chi-squared test
