# Supplementary material for: Integrated multi-cohort analysis of the Parkinson’s disease gut metagenome
Source: bioRxiv or medRxiv preprint supplement (doi:10.1101/2022.07.20.500694), 2022-07-20
Supplement: Supplementary file [file media-3.pdf]

| Characteristic     | N  | N = 88 <sup>1</sup> |
|--------------------|----|---------------------|
| levodopa           | 72 | 55 (76%)            |
| carbidopa          | 79 | 26 (33%)            |
| dopamine_agonists  | 70 | 18 (26%)            |
| MAO_B_inhibitors   | 70 | 24 (34%)            |
| rasagiline         | 70 | 10 (14%)            |
| selegiline         | 70 | 15 (21%)            |
| <sup>1</sup> n (%) |    |                     |
